# Supplementary material for: High-efficiency organic–silicon heterojunction solar cells with high work function PEDOT:F-based hole-selective contacts
Source: Royal Society of Chemistry journal article supplement (doi:10.1039/d4ta08449g), 2025-01-01
Supplement: d4ta08449g1.pdf [file d4ta08449g1.pdf]

## High efficiency organic-silicon heterojunction solar cells with high work function PEDOT:F-based hole-selective contacts

Xinliang Lou, Qunyu Bi, Yifan Diao, Zhao Wu, Kun Gao, Xinyu Wang, Dacheng Xu, Jing Wang, Hong Lin, Junjie Xie, Kun Li, Wenhao Li, Shibo Wang, Wei Shi, Fengxian Cao, Chunfang Xing, Wenhao Li, Xiaofeng Wu, Tengyue Hu, Ruxin Guo, Weiyu Shen, Niuwa Yang, Hao Tian, Chuanxiao Xiao, Guifang Xu, Xiaohong Zhang, Xinbo Yang

### Support Information

**Table S1** The J-V parameters of selected high efficiency organic/c-Si heterojunction solar cells

| Contact Types           | $V_{oc}/mV$ | $J_{sc}/mA\cdot cm^{-2}$ | FF/% | PCE/% |
|-------------------------|-------------|--------------------------|------|-------|
| b-PEI <sup>1</sup>      | 720         | 37.0                     | 72.9 | 19.4  |
| III-PEI <sup>2</sup>    | 641         | 37.6                     | 80.7 | 19.5  |
| PCBM <sup>3</sup>       | 706         | 40.67                    | 77.1 | 20.0  |
| PTAA <sup>4</sup>       | 634         | 39.1                     | 80.6 | 20.2  |
| PEDTOT:PSS <sup>5</sup> | 657         | 38.9                     | 80.6 | 20.6  |
| 2PACZ <sup>6</sup>      | 725         | 39.3                     | 79.2 | 21.4  |
| PEDOT:F                 | 654.8       | 39.7                     | 83.0 | 21.6  |

**Table S2** The thickness of spin-coated PEDOT:F films as a function of the concentration (PEDOT:F/ethanol ratio).

| PEDOT:F concentration | 0.1 | 0.2  | 0.3  | 0.4  | 0.5  |
|-----------------------|-----|------|------|------|------|
| Thickness (nm)        | 4.2 | 18.4 | 21.7 | 33.3 | 42.3 |

**Table S3** The main parameters used in the Quokka simulations

| Parameters                             | Value                                                           |
|----------------------------------------|-----------------------------------------------------------------|
| Cell thickness                         | 160 $\mu\text{m}$                                               |
| Front sheet resistance                 | 100 $\Omega/\square$                                            |
| Unit cell dimension                    | 700*700 $\mu\text{m}$                                           |
| Junction depth                         | 0.5 $\mu\text{m}$                                               |
| Collection efficiency (emitter & rear) | 1                                                               |
| $J_{0e}$ -passivated                   | 10 $\text{fA}/\text{cm}^2$                                      |
| $J_{0e}$ -contacted                    | 500 $\text{fA}/\text{cm}^2$                                     |
| Front contact resistivity              | $1 \times 10^{-4} \Omega \cdot \text{cm}^2$                     |
| Front contact shape/half width         | line /12.5 $\mu\text{m}$                                        |
| $p^+$ emitter half width               | 700 $\mu\text{m}$                                               |
| $p$ -Si bulk resistivity               | 3.0 $\Omega \cdot \text{cm}$                                    |
| Bulk lifetime                          | 3000 $\mu\text{s}$                                              |
| Rear contact shape                     | full area                                                       |
| Rear contact $J_0$ sweep range         | $1 \times 10^{-15}$ to $1 \times 10^{-11} \text{A}/\text{cm}^2$ |
| Rear contact $\rho_c$ sweep range      | $1 \times 10^{-3}$ to 10 $\Omega \cdot \text{cm}^2$             |
| Generation type                        | uniform                                                         |
| Generation current                     | 44 $\text{mA}/\text{cm}^2$                                      |
| Illumination side                      | Front                                                           |
| Shading width                          | 25 $\mu\text{m}$                                                |

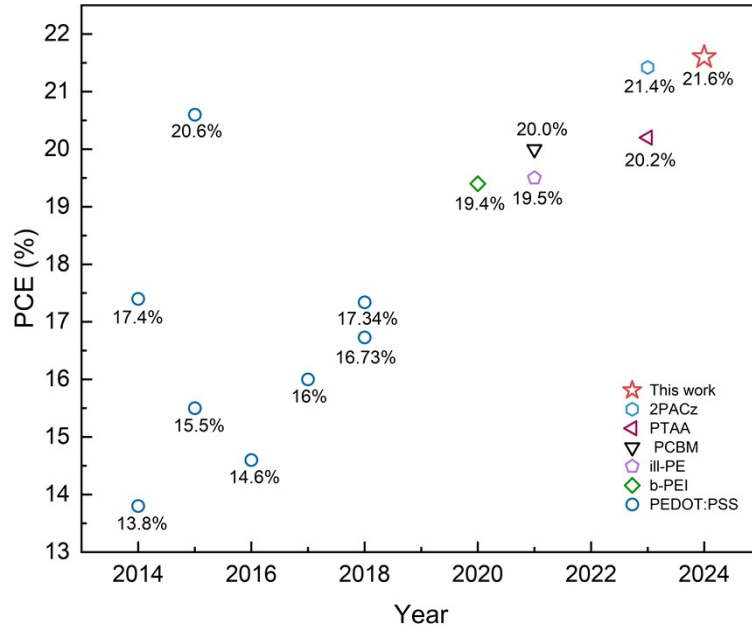

**Figure S1.** The PCE evolution of organic/c-Si heterojunction solar cells

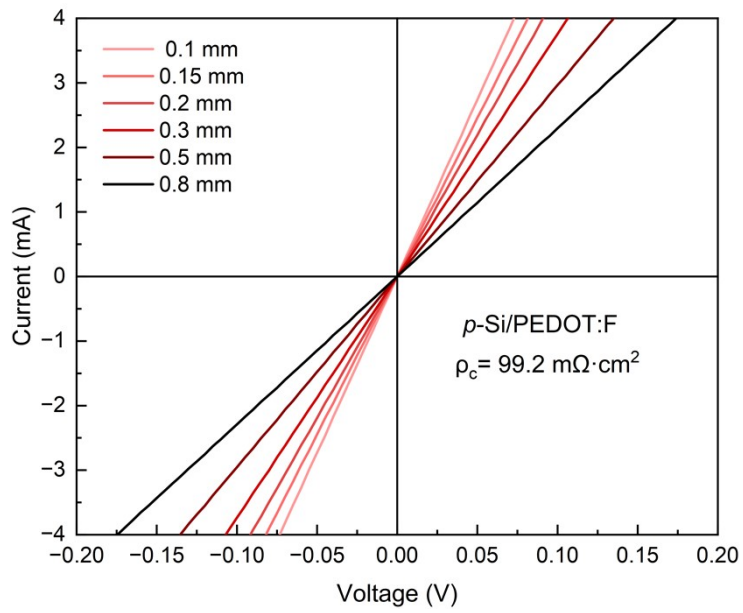

**Figure S2.** Dark  $I$ - $V$  curves of  $p$ -Si/PEDOT:F/Ag heterocontact measured under different spacings, and the extracted  $\rho_c$  is shown together.

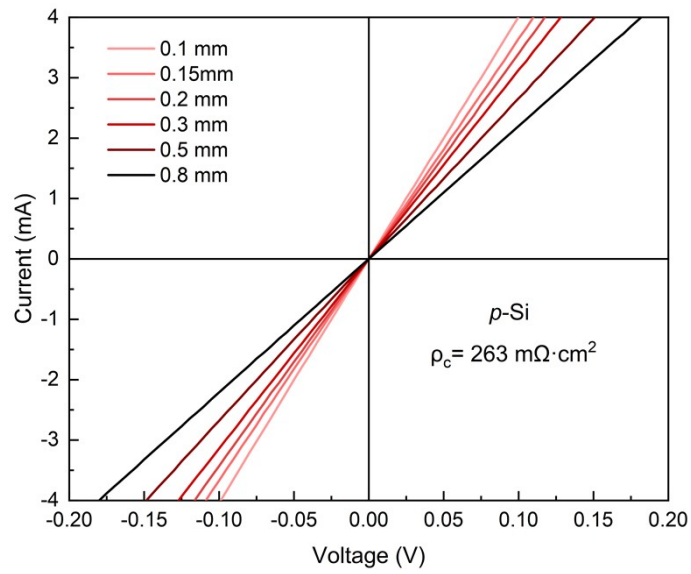

**Figure S3.** Dark  $I$ - $V$  curves of  $p$ -Si/Ag direct contact measured under different spacings, and the extracted  $\rho_c$  is shown together.

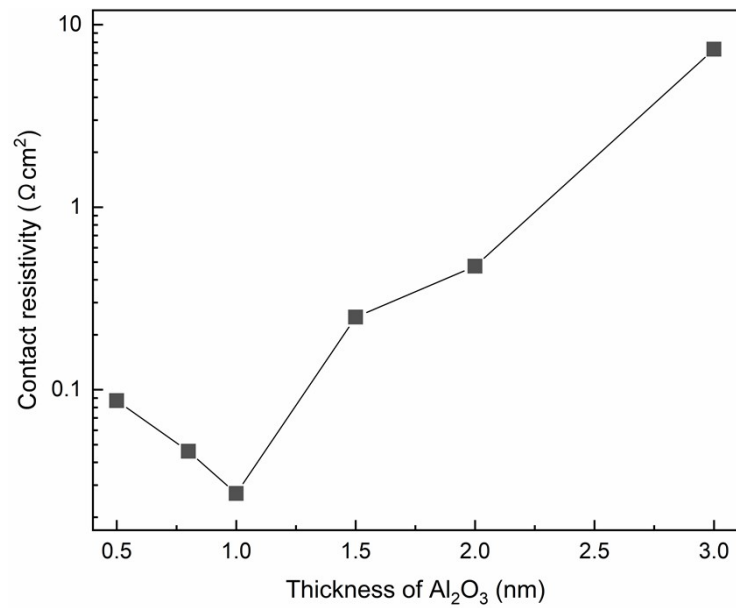

**Figure S4.** The contact resistivity of  $p$ -Si/Al<sub>2</sub>O<sub>3</sub>/PEDOT:F/Ag heterocontact with different thickness of Al<sub>2</sub>O<sub>3</sub>.

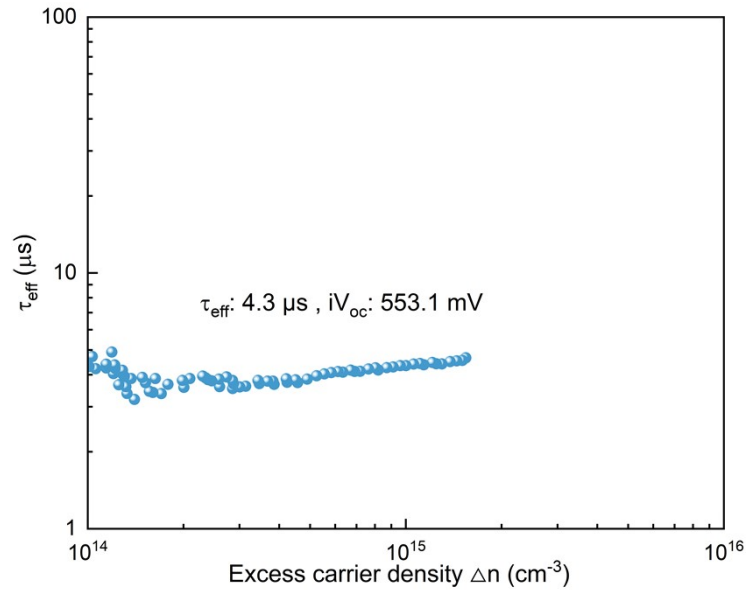

**Figure S5.** Injection level-dependent minority carrier lifetime of bare *p*-Si.

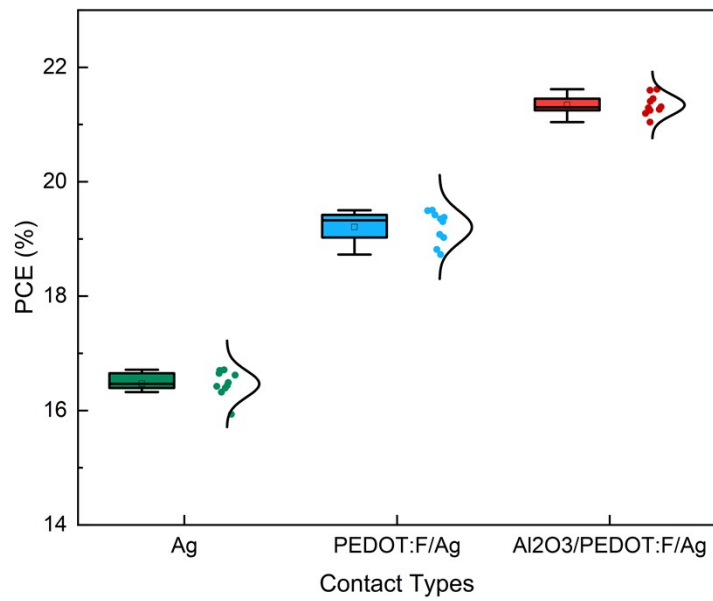

**Figure S6.** Efficiency distribution of *p*-Si solar cells with different rear contacts

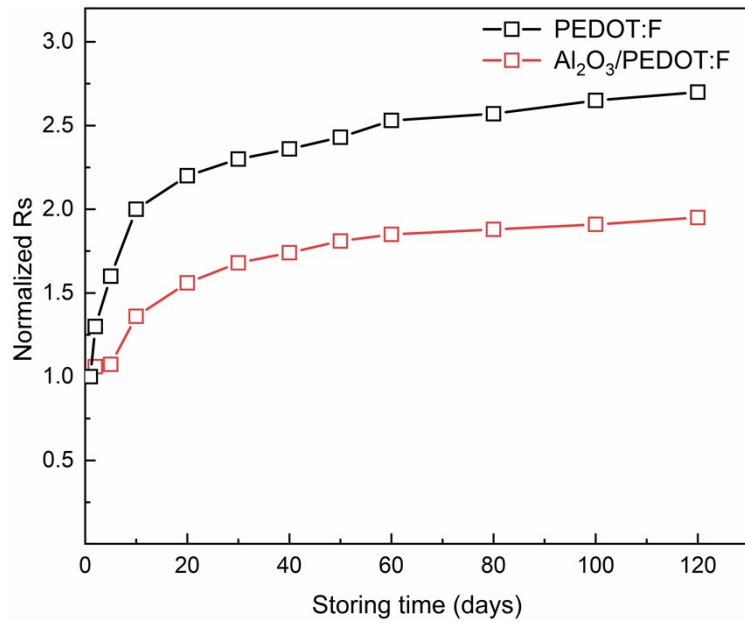

**Figure S7.** Dependence of normalized series resistance ( $R_s$ ) of  $p$ -Si solar cells with PEDOT:F and  $Al_2O_3/PEDOT:F$  rear contacts on the storing times.

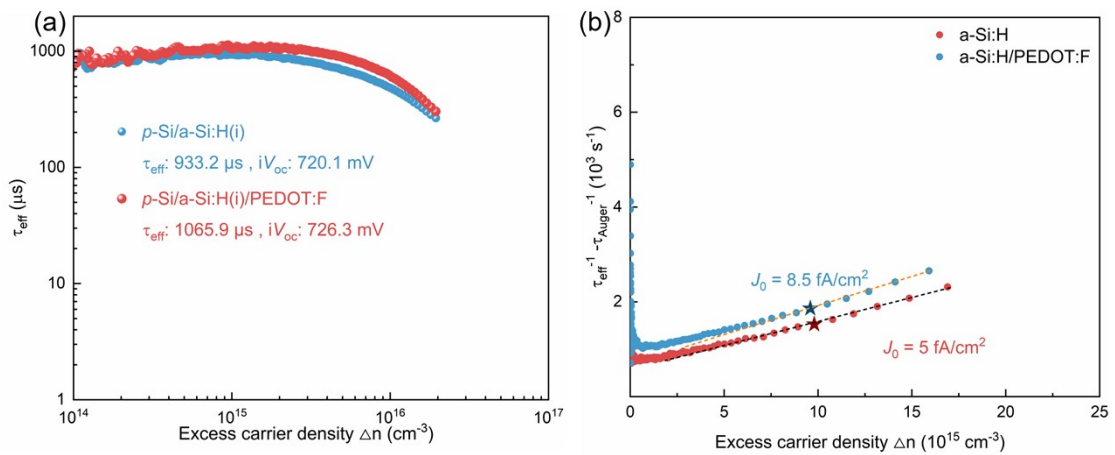

**Figure S8.** (a) Injection level-dependent minority carrier lifetime and (b)  $(\tau_{eff}^{-1} - \tau_{Auger}^{-1})$  of  $p$ -Si passivated by a-Si:H and a-Si:H/PEDOT:F stack. The  $\tau_{eff}$ ,  $iV_{oc}$  and  $J_0$  are extracted and shown together.

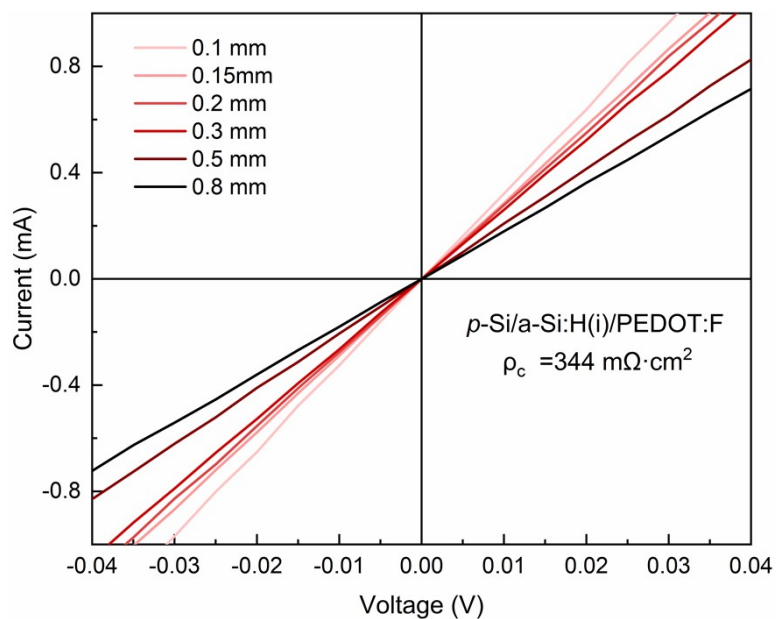

**Figure S9.** Dark  $I$ - $V$  curves of  $p$ -Si/ $a$ -Si:H/PEDOT:F/Ag heterocontact measured under different spacings, and the  $\rho_c$  is extracted and shown together.

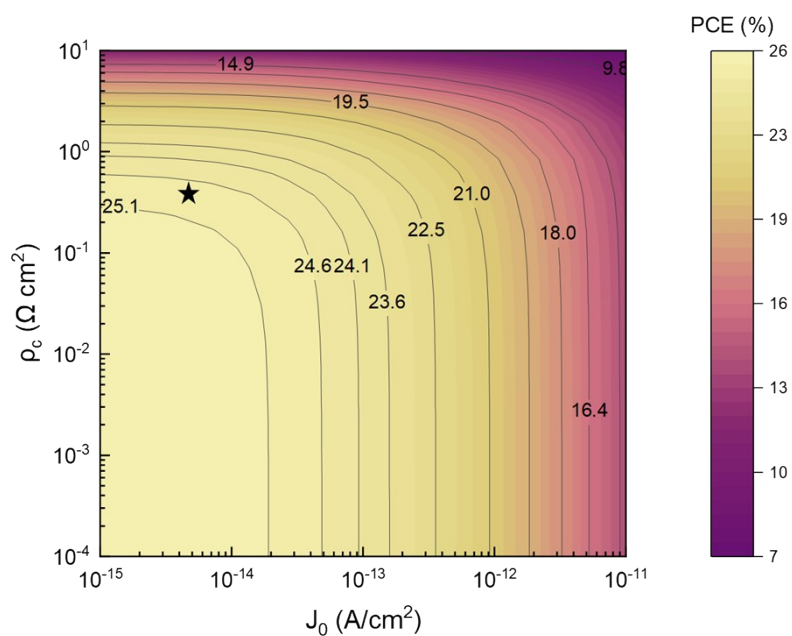

**Figure S10.** Dependence of the PCE of  $p$ -Si solar cells on  $J_0$  and  $\rho_c$  of the  $a$ -Si/PEDOT:F rear contact calculated using Quokka 2. The potential PCE of device is marked with a star.

## References

1. W. Ji, T. Allen, X. Yang, G. Zeng, S. De Wolf, A. Javey, ACS Energy Lett., 2020, 5, 897-902.
2. X. Yang, Z. Ying, Z. Yang, J. Xu, W. Wang, J. Wang, Z. Wang, L. Yao, B. Yan, J. Ye, Adv. Science., 2021, 8, 2003245.
3. Z. Sun, M. Liu, Y. Zhou, Q. Wang, Y. Yang, Y. Zhou, F. Liu, Sol. Energy Mater. Sol. Cells., 2022, 235, 111453.
4. X. Lou, X. Wang, D. Xu, K. Gao, S. Wang, C. Xing, K. Li, W. Li, D. Li, G. Xu, X. Yang, Sol. RRL., 2023, 7, 2300796-2300802.
5. D. Zielke, C. Niehaves, W. Lövenich, A. Elschner, M. Hörteis, J. Schmidt, Energy Procedia., 2015, 77, 331-339.
6. A. Prasetio, R. R. Pradhan, P. Dally, M. Ghadiyali, R. Azmi, U. Schwingenschlögl, T. G. Allen, S. De Wolf, Adv. Energy Mater., 2023, 14, 2303705.
